# Supplementary material for: ABHD17 proteins are novel protein depalmitoylases that regulate N-Ras palmitate turnover and subcellular localization
Source: eLife journal article supplement (doi:10.7554/elife.11306), 2015-12-22
Supplement: supp [file elife_poa_e11306_Supplementary_File_3.docx]

**Supplementary file 3.** List of gene-specific RT-qPCR primer pairs used in this study.

| **#** | **Gene** | **Oligo Pair Sequences** |
| --- | --- | --- |
| **1** | **β-actin**  **(REFERENCE GENE)** | 5'- ACCGAGCGCGGCTACAG -3'  5'- CTTAATGTCACGCACGATTTCC -3' |
| **2** | **ABHD17A1** | 5'-TGCCGACTTCCAGTACAGC-3'  5'-ACATACATGCAGGAGACGCG-3' |
| **3** | **ABHD17B1** | 5'-CTGCTCGATATGAGAGTGCTG-3'  5'-GTCAATGTTTGGGAATGCATC-3' |
| **4** | **ABHD17C1** | 5'-GTCAGAGCATTGGGACTG-3'  5'-GATATCTTGTCAATGCTGGG-3' |
